# Supplementary material
Source: publisher site journal article supplement (https://oneecosystem.pensoft.net/article/download/suppl/4775885/)
Supplement: Supplementary file 1

## Sheet: Annex Table 1 (MA)
	Annex Table 1 Compilation of reporting category/ecosystem services linkages from Millennium Ecosystem Assessment
	Reporting Category (chapter number)	Service (chapter number)
		01. Provisioning												02 Regulating										03 Cultural services										04 Supprting services
		01.01 Food					01.02 Fiber			01.03 Genetic resources (C26.2.1)	01.04 Biochemicals, natural medicines, and pharmaceuticals (C10)	01.05 Ornamental Resources (NA)	01.06 Freshwater (accessible renewable) (C7)	02.01 Air quality regulation (C13)	02.02 Climate regul-ation		02.03 Water regulation (C7)	02.04 Erosion regulation (C26.4.5)	02.05 Water purification and waste treatment (C7, C19)	02.05 Disease regulation (C14)	02.06 Pest regulation (C11.3)	02.07 Pollination (C11)	02.08 Natural hazard regulation (C16, C19)	03.01 Cultural diversity (NA)	03.02 Spiritual and religious value (C17)	03.03 Knowledge systems (NA)	03.04 Educational values (NA)	03.05 Inspiration	03.06 Aesthetic values (C17)	03.07 Social relations	03.08 Sense of place	03.09 Cultural heritage values	03.10 Recreation and ecotourism (C17, C19)	04.01 Soil formation (NA? indirect)	04.02 Photosynthesis (NA? indirect)	04.03 Primary production (C22)	04.04 Nutrient cycling (C12, S7)	04.05 Water cycling (C7)
		01.01.01 Crops (C8.2)	01.01.02 Livestock (C8.2)	01.01.03 Capture fisheries (C8.2.2, C18, C19 )	01.01.04 Aquaculture (C8)	01.01.05 Wild plant and animal products (C8.3.1)	01.02.01 Timber (C9, C21.1)	01.02.02 Cotton, hemp, silk (C9)	01.02.03 Wood fuel (C9)						02.02.01 Global (C13)	02.02.02 Regional and local (C13)
	01 Marine Fisheries Systems (C18)			2			1	1	1	2	1	0	0	0	1	1			1				0	1		0	0	0		0	0	1	1				1
	02 Coastal Systems (C19)	2	1	1	1	1	1	1	1	2	1	0	2	0	1	0	1	1	1	1			1	1		0	0	0	1	0	0	2	2				1
	03 Inland Water Systems (C20)	1	1	1	1	1			1	1	1	0	1	0	0	0	1	1	2	2		1	2	1	1	0	1	1	1	0	0	1	1	1			1
	04 Forest and Woodland Systems (C21)	2	2			1	2		2	1	2	0	2	0	2	1	1	1	1	2		2	2	1	1	0	0	0	1	0	0	1	1				1
	05 Dryland Systems (C22)	2	2					1			1	0	1	0	2	2	1	1	1	2		1	2	1	1	1	0	1	1	0	0	1	1	1		1	1	1
	06 Island Systems (C23)			1						1		0	2	0	0	0							0	0		1	0	0		0	0		1
	07 Mountain Systems (C24)	2	2			1	1		1	1	1	0	1	0	2	1	1		1				2	1	1	0	0	0		0	0	1	1	1
	08 Polar Systems (C25)			1		1				1	1	0	1	0	2	1			1				1	1		0	1	0	1	0	0		1		1	1	1
	09 Cultivated Systems (C26)	2	2		2			2		2		0	1	0	2	2		1	1		1	1	2	0		0	0	1		0	0	1	1				1
	10 Urban Systems (C27)											0	1	0	0	1							2	0		0	0	0		0	0
	Source: Millennium Ecosystem Assessment : Ecosystems and Human Well-being: Current State and Trends (MA 2005)
	Note: Metrics in chapters 1 through 28 were normalized to 1=Medium, 2=High
	Numeric codes for services were added by the author

## Sheet: Annex Table 2 (TEEB)
	Annex Table 2 Ecosystem/ecosystem services linkages compiled from TEEB (2010)
	Ecosystem	Ecosystem service
		Provisioning				Regulating							Habitat or supporting		Cultural
		Food	Raw materials	Fresh water	Medicinal resources	Local climate and air quality regulation	Carbon sequestration and storage	Moderation of extreme events	Waste-water treatment	Erosion preventaion and maintenance of soil fertility	Pollination	Biological control	Habitat for species	Maintenance of genetic diversity	Recreation and mental and physical health	Tourism	Aesthetic appreciation and inspiration for culture, art and design	Spiritual experience and sense of place:
	Marine	y			y								y				y
	Coastal areas	y	y		y			y					y		y	y	y
	Coral reefs		y		y			y					y				y
	Mangroves		y		y			y		y			y				y
	Dunes		y		y			y					y				y
	Tidelands		y		y			y					y				y
	Freshwater	y			y							y	y				y
	Lakes	y		y	y			y				y	y		y		y
	Rivers				y				y			y	y				y
	Wetlands				y			y	y			y	y				y
	Forests	y			y	y	y			y	y	y	y		y		y	y
	Mountain areas				y					y			y		y		y	y
	Grasslands	y			y		y			y	y	y	y		y		y
	Agro-ecosystems	y	y		y								y				y
	Urban areas				y	y							y		y
	Source: TEEB (2010) Box 1.4 and Figure 1.1
	1. Based on text examples. "y" indicates the link was mentioned.

## Sheet: Annex Table 3 (FEGS)
	Annex Table 3 Environmental sub-class/FEGS category linkages compiled from FEGS-CS
	Environmental sub-classes	Categories used to organize FEGS
		01 water	02 flora	03 presence of the environment	04 fauna	05 fiber	06 natural materials	07 open space	08 viewscapes	09 sounds and scents	10 fish	11 soil	12 pollinators	13 depredators and (pest) predators	14 timber	15 fungi	16 substrate	17 land	18 air	19 weather	20 wind	21 atmospheric phenomena
	11. Rivers and Streams	y	y	y	y	y	y	y	y	y	y
	12. Wetlands	y	y	y	y	y	y	y	y	y	y	y	y	y	y
	13. Lakes and Ponds	y	y	y	y	y	y	y	y	y	y
	14. Estuaries and Near Coastal Marine	y	y	y	y	y	y	y	y	y	y				y
	15. Open Oceans and Seas	y	y	y	y		y	y	y	y	y
	16. Groundwater	y		y					y	y
	21. Forests		y	y	y	y	y	y	y	y		y			y	y
	22. Agroecosystems		y	y	y		y	y	y	y		y	y	y		y
	23. Created Greenspace		y	y	y		y	y	y	y						y
	24. Grasslands		y	y	y	y	y	y	y	y		y	y	y	y	y
	25. Scrublands / Shrublands		y	y	y	y	y	y	y	y					y			y
	26. Barren / Rock and Sand		y	y	y		y	y	y	y								y
	27. Tundra		y	y	y	y	y	y	y	y					y			y
	28. Ice and Snow	y		y	y		y	y	y	y							y	y
	31. Atmosphere	y		y	y			y	y	y									y	y	y	y
	Source: Compiled by the author from Landers & Nahlik (2013).
	1. Since each FEGS category could have different interpretations for each beneficiary, attribution to the superset was done at the detailed level. For example, FEGS from Agroecosystems
	does not include cultivated crops.
	2. Rated "y" (for Yes) if service category was shown as relevant to one or more beneficiary/environmental sub-category combination.
	2. Rated "y" (for Yes) if service category was shown as relevant to one or more beneficiary/environmental sub-category combination.

## Sheet: Annex Table 4 (Maynard)
	Annex Table 4 Compilation of ecosystem reporting category by ecosystem service from Maynard et al. (2010)
	(sum of ecosystem/function x function/service ratings)
	Millennium Ecosystem Assessment Category	Ecosystem reporting category	Service
			Provisioning								Regulating									Cultural
			Food products	Water for Consumption	Building and Fibre Resources	Fuel Resources	Genetic Resources for Cultivated Products	Biochemical, medicinal and pharmaceutical resources	Ornamental Resources	Transport Infrastructure	Air Quality	Habitable Climate	Water Quality	Arable Land	Buffering Against Extremes	Pollination	Reduce Pests and Diseases	Productive Soils	Noise Abatement	Iconic Species	Cultural Diversity	Spiritual and Religious Values	Knowledge Systems	Inspiration	Aesthetic Values	Effect on Social Interactions	Sense of Place	Iconic Landscapes	Recreational Opportunities	Therapeutic Landscapes
	Marine	Deep ocean	168	114	114	87	120	117	107	49	81	95	107	84	91	106	126	112	18	146	98	120	134	124	134	107	133	124	124	133
	Coastal	Pelagic	180	128	132	102	145	142	134	53	89	103	121	94	99	127	138	129	25	178	125	149	171	153	169	131	164	159	150	162
		Benthic	183	129	133	102	142	136	123	43	98	106	130	101	104	132	146	141	23	171	110	135	166	139	160	127	151	149	138	148
		Coral reefs	190	132	134	98	154	153	137	43	95	105	126	98	111	141	148	139	24	186	124	148	180	153	172	139	164	157	152	159
		Seagrass	195	138	137	103	152	150	136	46	93	104	135	105	110	135	149	146	27	182	118	140	176	145	170	130	156	157	145	155
		Rocky shores	147	105	92	69	110	113	102	28	68	86	105	76	102	108	109	108	29	143	95	110	132	110	133	106	116	116	120	117
		Beaches	212	169	146	126	149	142	135	68	106	138	165	141	144	129	159	179	40	203	141	163	184	163	186	160	171	176	174	177
		Dunes	207	161	141	114	154	138	133	66	102	140	161	139	155	135	146	170	41	187	120	146	164	143	180	138	157	160	155	165
		Coastal zone wetlands	287	230	203	169	201	190	179	99	146	192	236	202	202	176	223	254	52	262	172	203	230	203	245	197	218	230	218	232
	Inland water	Palustrine wetlands	293	239	206	174	201	191	180	106	150	204	249	215	214	173	225	264	59	265	171	202	228	201	250	194	217	233	219	237
		Lacustrine wetlands	286	225	206	170	201	193	189	103	140	190	232	196	203	180	219	248	59	268	184	213	238	214	254	201	230	239	226	240
		Riverine wetlands	303	234	214	178	209	203	196	107	147	209	249	217	226	189	225	268	68	276	185	214	239	213	262	201	229	244	229	246
	Forest	Rainforests	330	247	239	201	235	235	229	113	177	233	267	235	242	212	251	288	81	311	211	250	284	245	302	237	269	282	262	279
		Sclerophyll forests	290	216	214	181	211	205	204	103	154	210	234	211	217	190	214	253	72	270	184	220	245	214	264	207	235	246	229	245
		Native plantations	230	177	176	151	157	157	162	86	127	172	200	175	176	145	177	208	63	212	144	172	194	167	209	164	185	197	182	190
		Exotic plantations	187	150	147	133	126	127	135	82	114	156	169	156	153	115	147	176	58	184	130	156	165	148	182	150	165	174	164	172
		Native regrowth	222	167	159	134	158	156	150	76	128	163	182	165	157	138	166	198	51	207	136	165	187	163	204	158	180	190	174	193
	Dryland	Native and improved grasslands	233	184	171	145	167	166	152	82	118	152	190	168	156	142	182	207	48	214	138	161	196	163	200	153	176	190	170	190
		Shrubland - woodland	263	197	190	157	192	186	175	86	140	184	210	189	190	171	197	232	58	242	157	187	217	187	231	176	204	214	196	217
	Island	Moreton Island	269	216	192	163	192	182	180	106	148	207	225	204	217	167	203	241	66	256	173	207	216	201	248	191	221	228	219	237
		Bribie Island	219	179	165	142	156	150	147	90	118	166	188	171	178	137	173	202	53	208	141	167	180	162	196	159	177	184	176	186
		North Stradbroke Island	267	216	192	163	193	183	180	104	144	200	221	198	215	169	205	236	66	255	172	205	218	199	245	188	219	225	216	232
		South Stradbroke and other Bay Islands	242	192	174	146	176	168	164	90	126	172	196	174	188	152	185	210	57	229	154	183	201	178	219	170	196	202	192	204
	Mountain	Montane	236	175	171	138	180	171	174	83	121	167	181	158	185	166	174	195	61	229	160	190	205	185	226	172	205	205	196	208
	Cultivated	Sugar cane	155	127	116	98	100	108	116	66	77	110	138	118	116	92	121	145	44	149	111	123	134	124	147	119	132	141	135	137
		Horticulture - small crops	155	120	114	101	109	124	113	62	81	106	124	107	103	97	127	130	37	158	114	131	149	129	149	122	138	144	136	145
		Horticulture - tree crops	189	145	135	119	125	135	130	68	109	138	158	140	139	113	149	166	52	183	125	148	170	143	178	142	159	168	156	164
		Other irrigated crops	151	120	112	98	103	119	110	62	78	103	126	106	102	91	127	131	36	153	111	126	143	125	144	119	133	140	133	139
	Urban	Dams	188	166	129	112	125	110	104	79	92	131	159	141	141	111	141	170	32	172	115	133	141	135	157	127	143	147	143	157
		Hard surfaces	26	28	19	16	17	16	17	22	10	22	27	21	24	17	22	28	5	27	24	25	18	27	27	20	27	26	26	31
		Parks and gardens	175	132	122	104	123	126	122	64	89	119	138	117	122	110	134	145	41	174	123	143	155	139	168	132	151	159	150	161
		Residential gardens	168	126	118	100	115	119	115	63	86	116	136	116	119	105	130	143	39	164	115	134	145	130	159	125	142	151	141	152
	Source: Maynard et al. (2010) data derived from http://www.ecosystemservicesseq.com.au/ecosystem-reporting-categories.html. Calculations by the author.
	Note: Values greater than or equal to the median (155) are shaded in blue.
	Maynard et al. (2010) first assess the importance of each ecosystem type to each of 20 ecosystem functions. “Rainforests” show the highest contribution to most functions. They then assess the contribution of each ecosystem function to
	each ES. This shows that, for example, the function of “Climate regulation” is the highest average contributor to all ES. Multiplying and summing the ecosystem/function matrix with the function/service matrix in this table shows, for
	example, that “Rainforests” are the most important contributor to “Food products”. This results in all ecosystems contributing to some degree to all ES. For example, all ecosystem types include “Aesthetic value” and “Iconic species”
	among their most important ES. Furthermore, all but one ecosystem types include “Food products” (hard surfaces) and “Therapeutic landscapes” (native plantations) among their most important ES.
	In terms of which services are provided, six of the ecosystem types are the most important providers of almost all ES. This means that according to this interpretation, directly or indirectly, six ecosystem types (coastal zone wetlands,
	palustrine wetlands, lacustrine wetlands, riverine wetlands, rainforests and sclerophyll forests) are the most important contributors to all ES. That rainforests emerge as the most important contributor to “Food products”, highlights the
	inter-relatedness between ecosystems through ecosystem processes rather than indicating ES are generated in situ in specific ecosystems. For example, “Food products” are not so much directly provided by rainforests, but rainforests
	play a critical role in disturbance regulation, climate regulation and other functions that contribute to food production in other ecosystem types.

## Sheet: Annex Table 5 (Ecosystems)
	Annex Table 5 Definitions and sources for superset of ecosystem types
	Category	Level 2	Level 3	Level 4	Source	Definition
	01. Artificial surfaces (including urban and associated areas)				SEEA-CF, Uhde et al. (2015)	Any type of artificial surfaces where the density of vegetated cover is less than 10% (including industrial zones, waste dump deposits and extraction sites)
		01.01 Dense artificial surfaces			Uhde et al. (2015)	Any type of artificial surfaces where the density of vegetated cover is less than 10% and where 60% or more of the surface is impermeable.
		01.02 Open artificial surfaces			Uhde et al. (2015)	Any type of artificial surfaces where the density of vegetated cover is less than 10% and where less than 60% of the surface is impermeable.
		01.03 Dams (Urban)			Maynard et al. (2010)	Artificial (urban) waterbodies created for the storage of water.
	02. Herbaceous crops				SEEA-CF, Uhde et al. (2015)	Surfaces of cultivated herbaceous crops (graminoids and forbs = grasses and flowering plants)
		02.01 Annual crops			Uhde et al. (2015)	Annual herbaceous crops excluding specialty crops such as vineyards and orchards
		02.02 Perennial crops and pasture			Uhde et al. (2015)	Perennial herbaceous crops and pastures, including pasture and forage.
	03. Woody crops				SEEA-CF	A main layer of permanent crops (trees or shrub crops) and includes all types of orchards and plantations (fruit trees, coffee and tea plantation, oil palms, rubber plantation, Christmas trees, etc.).
	04. Multiple or layered crops				SEEA-CF	This class combine two different land cover situations: (a) Two layers of different crops. A common case is the presence of one layer of woody crops (trees or shrubs) and another layer of herbaceous crop, e.g., wheat fields with olive trees in the Mediterranean area and intense horticulture, or oasis or typical coastal agriculture in Africa, where herbaceous fields are covered by palm trees. (b) …
	05. Grassland				SEEA-CF, Uhde et al. (2015)	Any geographical area dominated by natural herbaceous plants (grasslands, prairies, steppes and savannahs) with a cover of 10 per cent or more, irrespective of different human and/or animal activities, such as grazing or selective fire management. Woody plants (trees and/or shrubs) can be present, assuming their cover is less than 10 per cent. Excludes wetlands.
	06. Tree covered areas				SEEA-CF	Any area dominated by natural tree plants with a cover of 10 per cent or more. Other types of plants (shrubs and/or herbs) can be present, even with a density higher than that of trees. Areas planted with trees for afforestation purposes and forest plantations are included in this class. This class includes areas seasonally or permanently flooded with freshwater. It excludes coastal mangroves. It…
		06.01 Treed wetlands			Uhde et al. (2015)	Natural trees with cover from 10-100%. Shrubs and/or herbs can be present, even with a density higher than trees. Includes areas seasonally or permanently flooded with freshwater.
			06.01.01 Treed swamps		Uhde et al. (2015)	Natural trees with cover from 10-100%. Shrubs and/or herbs can be present, even with a density higher than trees. Includes areas seasonally or permanently flooded with freshwater. (where the soil is mineral)
			06.01.02 Treed peatlands		Uhde et al. (2015)	Natural trees with cover from 10-100%. Shrubs and/or herbs can be present, even with a density higher than trees. Includes areas seasonally or permanently flooded with freshwater. (where the soil is organic)
		06.02 Forest			Uhde et al. (2015)	Surfaces of natural trees with cover from 10-100%. Shrubs and/or herbs can be present, even with a density higher than trees. Includes areas seasonally or permanently flooded with freshwater. Excludes Treed Wetlands.
			06.02.01 Coniferous forest		Uhde et al. (2015)	Treed surfaces whose canopy density is at least 10% and where conifers occupy at least 75% of the basal area. Excludes Treed wetlands.
				06.02.01.01 Very dense coniferous forest	Uhde et al. (2015)	Treed surfaces whose canopy density is at least 60% and where conifers occupy at least 75% of the basal area. [Excludes Treed wetlands.]
				06.02.01.02 Dense coniferous forest	Uhde et al. (2015)	Treed surfaces whose canopy density is at least 40% and less than 60% and where conifers occupy at least 75% of the basal area. [Excludes Treed Wetlands.]
				06.02.01.03 Open coniferous forest	Uhde et al. (2015)	Treed surfaces whose canopy density is at least 10% and less than 40% and where conifers occupy at least 75% of the basal area. [Excludes Treed wetlands.]
			06.02.02 Deciduous forest		Uhde et al. (2015)	Treed surfaces whose canopy density is at least 10% and where deciduous trees occupy at least 75% of the basal area. [Excludes Treed wetlands.]
				06.02.02.01 Very dense deciduous forest	Uhde et al. (2015)	Treed surfaces whose canopy density is at least 60% and where deciduous trees occupy at least 75% of the basal area. [Excludes Treed wetlands.]
				06.02.02.02 Dense deciduous forest	Uhde et al. (2015)	Treed surfaces whose canopy density is at least 40% but less than 60% and where deciduous trees occupy at least 75% of the basal area. [Excludes Treed wetlands.]
				06.02.02.03 Open deciduous forest	Uhde et al. (2015)	Treed surfaces whose canopy density is at least 10% but less than 40% and where deciduous trees occupy at least 75% of the basal area. [Excludes Treed wetlands.]
			06.02.03 Mixed forest		Uhde et al. (2015)	Treed surfaces whose canopy density is at least 10% and where neither major types of trees occupy at least 75% of the basal area. [Excludes Treed wetlands.]
				06.02.03.01 Very dense mixed forest	Uhde et al. (2015)	Treed surfaces whose canopy density is at least 60% and where neither major types of trees occupy at least 75% of the basal area. [Excludes Treed wetlands.]
				06.02.03.02 Dense mixed forest	Uhde et al. (2015)	Treed surfaces whose canopy density is at least 40% but less than 60% and where neither major types of trees occupy at least 75% of the basal area. [Excludes Treed wetlands.]
				06.02.03.03 Open mixed forest	Uhde et al. (2015)	Treed surfaces whose canopy density is at least 10% but less than 40% and where neither major types of trees occupy at least 75% of the basal area. [Excludes Treed wetlands.]
	07. Mangroves				SEEA-CF	This class includes any geographical area dominated by woody vegetation (trees and/or shrubs) with a cover of 10 per cent or more that is permanently or regularly flooded by salt and/or brackish water located in the coastal areas or in the deltas of rivers.
	08. Shrub covered areas				SEEA-CF, Uhde et al. (2015)	Surfaces of natural shrubs where cover is at least 10% and where the forest cover is less than 10%. Herbaceous plants can be present at any density. Excludes regularly flooded areas. Excludes shrubs flooded by salt or brackish water in coastal area).
	09. Shrubs and/or herbaceous vegetation, aquatic or regularly flooded				SEEA-CF	This class includes any geographical area dominated by natural herbaceous vegetation (cover of 10 per cent or more) that is permanently or regularly flooded by fresh or brackish water (swamps, marsh areas, etc.). Flooding must persist for at least two months per year to be considered regular. Woody vegetation (trees and/or shrubs) can be present if their cover is less than 10 per cent.
		09.01 Aquatic or emergent marsh			Uhde et al. (2015)	Natural shrubs or herbs with cover from 10-100% that is permanently or regularly flooded by fresh or brackish water (swamps, marsh areas, etc.). Flooding must persist for at least 8 months per year to be considered regular. Forest cover is less than 10% and soil is often unconsolidated.
		09.02 Prairie marsh, riverwash			Uhde et al. (2015)	Wet prairies generally present grass cover on consolidated soil covering at least 80% of the surface. Typically, these correspond to extensive alluvial plains, under the influence of flash floods or very high river outflows.
		09.03 Untreed peatland			Uhde et al. (2015)	Wetlands with surfaces characterized by peat accumulation and whose vegetation occupies at least 10% of the surface where the density of the forest cover is less than 10%.
			09.03.01 Fen		Uhde et al. (2015)	Wetland surfaces characterized by peat accumulation and receiving water rich in dissolved minerals, whose vegetation cover, dominated by grass-like species and brown mosses, occupies at least 10% of the surface and where forest density is less than 10%.
			09.03.02 Bog		Uhde et al. (2015)	Wetland surfaces characterized by peat accumulation exclusively with water from precipitation, without the effect of groundwater and whose vegetation is dominated by Sphagnum occupies at least 10% of the surface where the forest cover is less than 10%.
		09.04 Shrub swamp			Uhde et al. (2015)	Surfaces of shrubs on mineral soil where the shrub cover is at least 10%, in water or flooded areas where water persists for at least two months a year and where the forest cover is less than 10 %.
	10. Sparsely natural vegetated areas				SEEA-CF	This class includes any geographical areas were the cover of natural vegetation is between 2 per cent and 10 per cent. This includes permanently or regularly flooded areas.
		10.01 Bryoids			Uhde et al. (2015)	Surfaces of bryophytes (mosses, liverworts, hornworts) and lichens (foliose or fruticose; excluding crustose) where the density of forest cover is less than 10%. Any types of natural vegetation with cover from 2-10%; includes permanently or regularly flooded areas.
		10.02 Sparsely natural vegetated area, excluding Bryoids			Uhde et al. (2015)	Sparsely natural vegetated areas: Any types of natural vegetation with cover from 2-10%; includes permanently or regularly flooded areas. Excludes bryoids.
	11. Terrestrial barren land				SEEA-CF	Areas dominated by natural abiotic surfaces (bare soil, sand, rocks, etc.) where the natural vegetation is absent or almost absent (covers less than 2 per cent). The class includes areas regularly flooded by inland water (lake shores, river banks, salt flats, etc.). It excludes coastal areas affected by the tidal movement of saltwater.
	12. Permanent snow and glaciers				SEEA-CF	Any type of glacier and perennial snow with persistence of 12 months per year.
	13. Inland water bodies				SEEA-CF	Any type of inland water body with a water persistence of 12 months per year.
		13.01 Rivers and Streams			Landers & Nahlik (2013), Maynard et al. (2010), TEEB (2010)	Flowing inland water bodies (rivers and streams). Excludes regularly flooded areas.
			13.01.01 Deep water		Uhde et al. (2015)	Flowing inland water bodies where the depth is 2 metres or more in the middle of the summer (ref: Canadian Wetland Classification)
			13.01.02 Shallow water		Uhde et al. (2015)	Flowing inland water bodies where the depth is less than 2 metres in the middle of the summer (ref: Canadian Wetland Classification)
		13.02 Lakes and Ponds			Landers & Nahlik (2013), Maynard et al. (2010), TEEB (2010)	Standing inland water bodies. Excludes regularly flooded areas.
			13.02.01 Deep water		Uhde et al. (2015)	Standing inland water bodies where the depth is 2 metres or more in the middle of the summer (ref: Canadian Wetland Classification)
			13.02.02 Shallow water		Uhde et al. (2015)	Standing inland water bodies where the depth is less than 2 metres in the middle of the summer (ref: Canadian Wetland Classification)
	14. Coastal water bodies and intertidal areas				Uhde et al. (2015)	Surfaces subject to the persistent presence of water (eg. coastal flats), within the normal baseline, and connected to the sea geographical attributes (e.g., Lagoons and estuaries), inside the straight baseline.
		14.01 Coastal water bodies			SEEA-CF, MA (2005)	Undistinguished saltwater area between 50 meters below mean sea level and 50 meters above the high tide level or extending landward to a distance 100 kilometers from shore.
			14.01.01 Pelagic		Maynard et al. (2010), Costanza et al. (2007) (shelf)	Pelagic ecosystems consist of the water above the sea floor from 1 - 50m. Flora are represented primarily by macro-algae and micro-algae.
			14.01.02 Benthic		Maynard et al. (2010)	Benthic ecosystems include the sea floor, the water column up to 1m and any bottom-dwelling organisms. The substrate consists predominately of sand and silt and flora are represented primarily by macro-algae and micro-algae.
		14.02 Intertidal areas			TEEB (2010) (tidelands), SEEA-CF	Distinguished sea areas between 50 meters below mean sea level and 50 meters above the high tide level or extending landward to a distance 100 kilometers from shore. Includes coral reefs, intertidal zones, estuaries, coastal aquaculture, and seagrass communities.
			14.02.01 Lagoons		SEEA-CF	A coastal lagoon is a shallow, coastal body of water, separated from the ocean by a barrier. This barrier can be formed by a coral reef, barrier islands, a sand bar or spit, shingle, or, less frequently, rocks.
			14.02.02 Rocky shores		Maynard et al. (2010)	Rocky outcrops in coastal areas (including sub-ecosystems of platforms, rock pools and boulder fields). Characteristic vegetation may include seaweeds (algae), lichens and microscopic plants.
			14.02.03 Beaches		Maynard et al. (2010)	The part of a coast that is washed by waves or tides which cover it with sediments of various sizes and composition such as sand or pebbles (unconsolidated intertidal materials). This ecosystem is usually unvegetated.
			14.02.04 Coral reefs		Maynard et al. (2010), Costanza et al. (1997), TEEB (2010), de Groot et al. 2012)	Coral reefs are underwater structures created by a thin layer of living coral polyps secreting calcium carbonate to build a limestone skeleton over many generations.
			14.02.05 Seagrass beds		Maynard et al. (2010), Costanza et al. (1997)	Seagrass are marine flowering plants that form meadows in estuaries and shallow coastal waters with sandy or muddy substrates.
			14.02.06 Estuaries		Costanza et al. (1997)	The point at which a river and the sea meet. They are areas of transition from land to sea, as well as from freshwater to saltwater.
			14.02.07 Coastal dunes		Maynard et al. (2010), TEEB (2010)	Vegetated sand ridges.
	15. Open ocean				Costanza (1997), Maynard et al. (2010), Landers & Nahlik (2013)	Deep ocean ecosystems are where the sea is deeper than 50m and the water regimes are determined primarily by the ebb and flow of oceanic tides (waves and currents).
		15.01 Pelagic			Maynard et al. (2010)	Pelagic ecosystems consist of the water above the sea floor from 1 - 50m. Flora are represented primarily by macro-algae and micro-algae.
		15.02 Benthic			Maynard et al. (2010)	Benthic ecosystems include the sea floor, the water column up to 1m and any bottom-dwelling organisms. The substrate consists predominately of sand and silt and flora are represented primarily by macro-algae and micro-algae.
	16. Atmosphere				Landers & Nahlik (2013)	The atmosphere overlays, interacts with, and permeates all other Environmental [Sub]Classes.
	17. Groundwater				Landers & Nahlik (2013)	Subsurface water (shallow, unconfined, renewable)
	18. Soil				USDA (n.d.)	The unconsolidated organo-mineral material on the immediate surface of the Earth that serves as a natural medium for the growth of land plants.

## Sheet: Annex Table 6 (Consensus)
	Annex Table 6 Consensus matrix: Sources with statements of importance of ecosystem type/ecosystem services linkage
	Ecosystem type				Ecosystem service
					01. Provisioning																02. Regulation & Maintenance																					03. Cultural
					01.01 Nutrition								01.02 Materials					01.03 Energy			02.01 Mediation of waste, toxics and other nuisances					02.02 Mediation of flows						02.03 Maintenance of physical, chemical, biological conditions										03.01 Physical and intellectual interactions with biota, ecosystems, and land-/seascapes [environmental settings]							03.02 Spiritual, symbolic and other interactions with biota, ecosystems, and land-/seascapes [environmental settings]
					01.01.01 Biomass						01.01.02 Water		01.02.01 Biomass			01.02.02 Water		01.03.01 Biomass-based energy sources		01.03.02 Mechanical energy	02.01.01 Mediation by biota		02.01.02 Mediation by ecosystems			02.02.01 Mass flows		02.02.02 Liquid flows		02.02.03 Gaseous / air flows		02.03.01 Lifecycle maintenance, habitat and gene pool protection		02.03.02 Pest and disease control		02.03.03 Soil formation and composition		02.03.04 Water conditions		02.03.05 Atmospheric composition and climate regulation		03.01.01 Physical and experiential interactions		03.01.02 Intellectual and representative interactions					03.02.01 Spiritual and/or emblematic
					01.01.01.01 Cultivated crops	01.01.01.02 Reared animals and their outputs	01.01.01.03 Wild plants, algae and their outputs	01.01.01.04 Wild animals and their outputs	01.01.01.05 Plants and algae from in-situ aquaculture	01.01.01.06 Animals from in-situ aquaculture	01.01.02.01 Surface water for drinking	01.01.02.02 Ground water for drinking	01.02.01.01 Fibres and other materials from plants, algae and animals for direct use or processing	01.02.01.02 Materials from plants, algae and animals for agricultural use	01.02.01.03 Genetic materials from all biota	01.02.02.01 Surface water for non-drinking purposes	01.02.02.02 Ground water for non-drinking purposes	01.03.01.01 Plant-based resources	01.03.01.02 Animal-based resources	01.03.02.01 Animal-based energy	02.01.01.01 Bio-remediation by micro-organisms, algae, plants, and animals	02.01.01.02 Filtration / sequestration / storage / accumulation by micro-organisms, algae, plants, and animals	02.01.02.01 Filtration / sequestration / storage / accumulation by ecosystems	02.01.02.02 Dilution by atmosphere, freshwater and marine ecosystems	02.01.02.03 Mediation of smell/noise/visual impacts	02.02.01.01 Mass stabilisation and control of erosion rates	02.02.01.02 Buffering and attenuation of mass flows	02.02.02.01 Hydrological cycle and water flow maintenance	02.02.02.02 Flood protection	02.02.03.01 Storm protection	02.02.03.02 Ventilation and transpiration	02.03.01.01 Pollination and seed dispersal	02.03.01.02 Maintaining nursery populations and habitats	02.03.02.01 Pest control	02.03.02.02 Disease control	02.03.03.01 Weathering processes	02.03.03.02 Decomposition and fixing processes	02.03.04.01 Chemical condition of freshwaters	02.03.04.02 Chemical condition of salt waters	02.03.05.01 Global climate regulation by reduction of greenhouse gas concentrations	02.03.05.02 Micro and regional climate regulation	03.01.01.01 Experiential use of plants, animals and land- / seascapes in different environmental settings	03.01.01.02 Physical use of land- / seascapes in different environmental settings	03.01.02.01 Scientific	03.01.02.02 Educational	03.01.02.03 Heritage, cultural	03.01.02.04 Entertainment	03.01.02.05 Aesthetic	03.02.01.01 Symbolic
	Level 1	Level 2	Level 3	Level 4
	01. Artificial surfaces (including urban and associated areas)	01.01 Dense artificial surfaces									EU	EU	TU	U		EU	EU	U			U	U	U	U	U	U	EU	U	EU	EU	TU	U	T			U	U	U	U	U	ETU	TU	TU			TU	U	U	U
		01.02 Open artificial surfaces									EU	EU	TU	U		EU	EU	U			U	U	U	U	U	U	EU	U	EU	EU	TU	U	T			U	U	U	U	U	ETU	TU	TU			TU	U	U	U
		01.03 Dams			M	M	M	M	M	M	EM	EM	T			E	E				M	M	M	M			E		E	E	T		MT			M	M	M	M		ET	MT	MT			T		M
	02. Herbaceous crops	02.01 Annual crops			EKPTU	EKPTU	FKTU	FKTU	EKPTU	EKPTU	EU	EU	EFKPTU	FPTU	EFK	EU	EU	KPTU	KPTU		U	U	EU	EU		EU	EU	U	EU	EU	U	EFU	MT	EFU	U	U	EU	FU	U	EU	EU	EFMU	EFMU	F	F	EU	EFU	FTU	EFTU
		02.02 Perennial crops and pasture			EKMPTU	EKMPTU	FKMTU	FKMTU	EKMPTU	EKMPTU	EU	EU	EFKPTU	FPTU	EFK	EU	EU	KPTU	KPTU		U	U	EU	EU		EU	EU	U	EU	EU	U	EFU	MT	EFU	U	U	EU	FU	U	EU	EU	EFMU	EFMU	F	F	EU	EFU	FMTU	EFTU
	03. Woody crops				EKMPTU	EKMPTU	FKMTU	FKMTU	EKMPTU	EKMPTU	EU	EU	EFKPTU	FPTU	EFK	EU	EU	KPTU	KPTU		MU	MU	EMU	EMU		EU	EU	U	EU	EU	U	EFU	MT	EFU	U	MU	EMU	FMU	MU	EU	EU	EFMU	EFMU	FM	FM	EU	EFMU	FMTU	EFTU
	04. Multiple or layered crops				EKMPTU	EKMPTU	FKMTU	FKMTU	EKMPTU	EKMPTU	EU	EU	EFKPTU	FPTU	EFK	EU	EU	KPTU	KPTU		MU	MU	EMU	EMU		EU	EU	U	EU	EU	U	EFU	MT	EFU	U	MU	EMU	FMU	MU	EU	EU	EFMU	EFMU	FM	FM	EU	EFMU	FMTU	EFTU
	05. Grassland				DEKMT	DEKMT	DFKMPT	DFKMPT	DKMT	DKMT	EKM	EKM	EFKMT	FM	EFKM	E	E	F			CMTU	CMTU	CEMTU	CEMTU	C	EMTU	EMU	E	EMU	EMU	U	EFTU	DMTU	FMT	MT	EMTU	EMTU	FMU	MU	ETU	EU	EFMPTU	EFMPTU	EFM	FM	EPTU	EFMPU	EFMPTU	EFMTU
	06. Tree covered areas	06.01 Treed wetlands	06.01.01 Treed swamps		DEKMPT	DEKMPT	DEFKMPT	DEFKMPTU	DEKMPT	DEKMPTU	CDEFMPU	CDEFMPU	DFKMPTU	DFMPU	EFKM	CDEFPU	CDEFPU	EFMPU	MP		CDMPTU	CDMPTU	CDEMPTU	CDEMPTU	CD	CDEMTU	CDEMTU	DEPU	CDEMPTU	CDEMTU	C	EFM	CDMTU	DFMTU	DMTU	DEMU	DEMU	FMPU	MPU	DM	CM	CEFMPU	CEFMPU	CFM	CEFM	CEMPU	CDEFMPU	CDEFMPTU	CDEFMTU
			06.01.02 Treed peatlands		DEKMPT	DEKMPT	DEFKMPT	DEFKMPTU	DEKMPT	DEKMPTU	CDEFMPU	CDEFMPU	DFKMPTU	DFMPU	EFKM	CDEFPU	CDEFPU	EFMPU	MP		CDMPTU	CDMPTU	CDEMPTU	CDEMPTU	CD	CDEMTU	CDEMTU	DEPU	CDEMPTU	CDEMTU	C	EFM	CDMTU	DFMTU	DMTU	DEMU	DEMU	FMPU	MPU	DM	CM	CEFMPU	CEFMPU	CFM	CEFM	CEMPU	CDEFMPU	CDEFMPTU	CDEFMTU
		06.02 Forest	06.02.01 Coniferous forest	06.02.01.01 Very dense coniferous forest	DEMT	DEMT	DEFMPT	DEFMPT	DMT	DMT	EKMP	EKMP	CDEFKMTU	CEFMU	EFKM	EP	EP	CEFKMU	CKM		CDMPTU	CDMPTU	CDEMPTU	CDEMPTU	CDU	CEMTU	EMU	DEP	DEMPU	EMU	MTU	EMT	DMTU	DMT	DMT	CEMTU	CEMTU	CFMPU	MPU	CDEMPTU	EMTU	CEFMTU	CEFMTU	FM	FM	EMTU	CDEFMU	CDEFMTU	FMTU
				06.02.01.02 Dense coniferous forest	DEMT	DEMT	DEFMPT	DEFMPT	DMT	DMT	EKMP	EKMP	CDEFKMTU	CEFMU	EFKM	EP	EP	CEFKMU	CKM		CDMPTU	CDMPTU	CDEMPTU	CDEMPTU	CDU	CEMTU	EMU	DEP	DEMPU	EMU	MTU	EMT	DMTU	DMT	DMT	CEMTU	CEMTU	CFMPU	MPU	CDEMPTU	EMTU	CEFMTU	CEFMTU	FM	FM	EMTU	CDEFMU	CDEFMTU	FMTU
				06.02.01.03 Open coniferous forest	DMT	DMT	DFMPT	DFMPT	DMT	DMT	KMP	KMP	CDFKMTU	CFMU	FKM	P	P	CFKMU	CKM		CDMPTU	CDMPTU	CDMPTU	CDMPTU	CDU	CMTU	MU	DP	DMPU	MU	MTU	MT	DMTU	DMT	DMT	CMTU	CMTU	CFMPU	MPU	CDMPTU	MTU	CFMTU	CFMTU	FM	FM	MTU	CDFMU	CDFMTU	FMTU
			06.02.02 Deciduous forest	06.02.02.01 Very dense deciduous forest	DEMT	DEMT	DEFMPT	DEFMPT	DMT	DMT	EKMP	EKMP	CDEFKMTU	CEFMU	EFKM	EP	EP	CEFKMU	CKM		CDMPTU	CDMPTU	CDEMPTU	CDEMPTU	CDU	CEMTU	EMU	DEP	DEMPU	EMU	MTU	EMT	DMTU	DMT	DMT	CEMTU	CEMTU	CFMPU	MPU	CDEMPTU	EMTU	CEFMTU	CEFMTU	FM	FM	EMTU	CDEFMU	CDEFMTU	FMTU
				06.02.02.02 Dense deciduous forest	DEMT	DEMT	DEFMPT	DEFMPT	DMT	DMT	EKMP	EKMP	CDEFKMTU	CEFMU	EFKM	EP	EP	CEFKMU	CKM		CDMPTU	CDMPTU	CDEMPTU	CDEMPTU	CDU	CEMTU	EMU	DEP	DEMPU	EMU	MTU	EMT	DMTU	DMT	DMT	CEMTU	CEMTU	CFMPU	MPU	CDEMPTU	EMTU	CEFMTU	CEFMTU	FM	FM	EMTU	CDEFMU	CDEFMTU	FMTU
				06.02.02.03 Open deciduous forest	DMT	DMT	DFMPT	DFMPT	DMT	DMT	KMP	KMP	CDFKMTU	CFMU	FKM	P	P	CFKMU	CKM		CDMPTU	CDMPTU	CDMPTU	CDMPTU	CDU	CMTU	MU	DP	DMPU	MU	MTU	MT	DMTU	DMT	DMT	CMTU	CMTU	CFMPU	MPU	CDMPTU	MTU	CFMTU	CFMTU	FM	FM	MTU	CDFMU	CDFMTU	FMTU
			06.02.03 Mixed forest	06.02.03.01 Very dense mixed forest	DEMT	DEMT	DEFMPT	DEFMPT	DMT	DMT	EKMP	EKMP	CDEFKMTU	CEFMU	EFKM	EP	EP	CEFKMU	CKM		CDMPTU	CDMPTU	CDEMPTU	CDEMPTU	CDU	CEMTU	EMU	DEP	DEMPU	EMU	MTU	EMT	DMTU	DMT	DMT	CEMTU	CEMTU	CFMPU	MPU	CDEMPTU	EMTU	CEFMTU	CEFMTU	FM	FM	EMTU	CDEFMU	CDEFMTU	FMTU
				06.02.03.02 Dense mixed forest	DEMT	DEMT	DEFMPT	DEFMPT	DMT	DMT	EKMP	EKMP	CDEFKMTU	CEFMU	EFKM	EP	EP	CEFKMU	CKM		CDMPTU	CDMPTU	CDEMPTU	CDEMPTU	CDU	CEMTU	EMU	DEP	DEMPU	EMU	MTU	EMT	DMTU	DMT	DMT	CEMTU	CEMTU	CFMPU	MPU	CDEMPTU	EMTU	CEFMTU	CEFMTU	FM	FM	EMTU	CDEFMU	CDEFMTU	FMTU
				06.02.03.03 Open mixed forest	DMT	DMT	DFMPT	DFMPT	DMT	DMT	KMP	KMP	CDFKMTU	CFMU	FKM	P	P	CFKMU	CKM		CDMPTU	CDMPTU	CDMPTU	CDMPTU	CDU	CMTU	MU	DP	DMPU	MU	MTU	MT	DMTU	DMT	DMT	CMTU	CMTU	CFMPU	MPU	CDMPTU	MTU	CFMTU	CFMTU	FM	FM	MTU	CDFMU	CDFMTU	FMTU
	07. Mangroves				CDEKM	CDEKM	CDEFKM	CDEFKM	CDEKM	CDEKM	DEFM	DEFM	CDEFKMT	CDEFMT	EFKM	DEF	DEF	CEFMT	CMT		CDM	CDM	CDEM	CDEM	CD	CDEMT	CDEMT	E	CDEMT	CDEMT		M	CDMT	M	M	EMT	EMT	FM	M	EM	M	CEFM	CEFM	FM	FM	EM	CDEFM	CDEFMT	FMT
	08. Shrub covered areas				EM	EM	FMP	FMP	M	M	EMU	EMU	EFMU	FMU	EFM	EU	EU	FMU	M		CMU	CMU	CEMU	CEMU	C	EMU	EMU	EU	EMU	EMU		EM	DMU	M	M	EMU	EMU	FMU	MU	EMU	EMU	EFMPU	EFMPU	EFM	FM	EMPU	EFMPU	EFMPU	EFMU
	09. Shrubs and/or herbaceous vegetation, aquatic or regularly flooded	09.01 Aquatic or emergent marsh			DEKMP	DEKMP	DEFKMP	DEFKMPU	DEKMP	DEKMPU	CDEFMPU	CDEFMPU	DFKMPTU	DFMPU	EFKM	CDEFPU	CDEFPU	EFMPU	MP		CDMPTU	CDMPTU	CDEMPTU	CDEMPTU	CD	CDEMTU	CDEMTU	DEPU	CDEMPTU	CDEMTU	C	EFM	CDMTU	DFMTU	DMTU	DEMU	DEMU	FMPU	MPU	DM	CM	CEFMPU	CEFMPU	CFM	CEFM	CEMPU	CDEFMPU	CDEFMPTU	CDEFMTU
		09.02 Prairie marsh, riverwash			DEKMP	DEKMP	DEFKMP	DEFKMPU	DEKMP	DEKMPU	CDEFMPU	CDEFMPU	DFKMPTU	DFMPU	EFKM	CDEFPU	CDEFPU	EFMPU	MP		CDMPTU	CDMPTU	CDEMPTU	CDEMPTU	CD	CDEMTU	CDEMTU	DEPU	CDEMPTU	CDEMTU	C	EFM	CDMTU	DFMTU	DMTU	DEMU	DEMU	FMPU	MPU	DM	CM	CEFMPU	CEFMPU	CFM	CEFM	CEMPU	CDEFMPU	CDEFMPTU	CDEFMTU
		09.03 Untreed peatland	09.03.01 Fen		DEKMP	DEKMP	DEFKMP	DEFKMPU	DEKMP	DEKMPU	CDEFMPU	CDEFMPU	DFKMPTU	DFMPU	EFKM	CDEFPU	CDEFPU	EFMPU	MP		CDMPTU	CDMPTU	CDEMPTU	CDEMPTU	CD	CDEMTU	CDEMTU	DEPU	CDEMPTU	CDEMTU	C	EFM	CDMTU	DFMTU	DMTU	DEMU	DEMU	FMPU	MPU	DM	CM	CEFMPU	CEFMPU	CFM	CEFM	CEMPU	CDEFMPU	CDEFMPTU	CDEFMTU
			09.03.02 Bog		DEKMP	DEKMP	DEFKMP	DEFKMPU	DEKMP	DEKMPU	CDEFMPU	CDEFMPU	DFKMPTU	DFMPU	EFKM	CDEFPU	CDEFPU	EFMPU	MP		CDMPTU	CDMPTU	CDEMPTU	CDEMPTU	CD	CDEMTU	CDEMTU	DEPU	CDEMPTU	CDEMTU	C	EFM	CDMTU	DFMTU	DMTU	DEMU	DEMU	FMPU	MPU	DM	CM	CEFMPU	CEFMPU	CFM	CEFM	CEMPU	CDEFMPU	CDEFMPTU	CDEFMTU
		09.04 Shrub swamp			DEKMP	DEKMP	DEFKMP	DEFKMPU	DEKMP	DEKMPU	CDEFMPU	CDEFMPU	DFKMPTU	DFMPU	EFKM	CDEFPU	CDEFPU	EFMPU	MP		CDMPTU	CDMPTU	CDEMPTU	CDEMPTU	CD	CDEMTU	CDEMTU	DEPU	CDEMPTU	CDEMTU	C	EFM	CDMTU	DFMTU	DMTU	DEMU	DEMU	FMPU	MPU	DM	CM	CEFMPU	CEFMPU	CFM	CEFM	CEMPU	CDEFMPU	CDEFMPTU	CDEFMTU
	10. Sparsely natural vegetated areas	10.01 Bryoids			EM	EM	EFM	EFM	M	M	EKMU	EKMU	EFKMTU	EFMU	EFKM	EU	EU	EFMU	M		MU	MU	EMU	EMU		EMTU	EMU	EU	EMU	EMU		EM	MTU	M	M	EMTU	EMTU	FMU	MU	EMU	EMU	EFMTU	EFMTU	EFM	FM	EMTU	EFMU	EFMTU	EFMTU
		10.02 Sparsely natural vegetated area			EM	EM	EFM	EFM	M	M	EKMU	EKMU	EFKMTU	EFMU	EFKM	EU	EU	EFMU	M		MU	MU	EMU	EMU		EMTU	EMU	EU	EMU	EMU		EM	MTU	M	M	EMTU	EMTU	FMU	MU	EMU	EMU	EFMTU	EFMTU	EFM	FM	EMTU	EFMU	EFMTU	EFMTU
	11. Terrestrial barren land				EM	EM	EFM	EFM	M	M	EKMU	EKMU	EFKMTU	EFMU	EFKM	EU	EU	EFU			MU	MU	EMU	EMU		EMTU	EMU	EU	EMU	EMU		EM	MTU	M	M	EMTU	EMTU	FMU	MU	EMU	EMU	EFMTU	EFMTU	EFM	FM	EMTU	EFMU	EFMTU	EFMTU
	12. Permanent snow and glaciers						E	EF			EF	EF	F		EF	EF	EF						E	E		E	E		E	E							E	F		E	E	EF	EF	F	EF		EF	EF	F
	13. Inland water bodies	13.01 Rivers and streams	13.01.01 Deep water		EKMT	EKMT	EFKMT	EFKMTU	EKMT	EKMTU	CDEFMU	CDEFMU	FKMTU	FMU	EFKM	CDEFU	CDEFU	EFMU	M		CMTU	CMTU	CEMTU	CEMTU	C	EMU	EMU	EU	CEMU	EMU		EM	MTU	MTU	MTU	EMU	EMU	FMU	MU	M	M	CEFMU	CEFMU	FM	EFM	EMU	CDEFMU	CDEFMTU	EFMTU
			13.01.02 Shallow water		EKMT	EKMT	EFKMT	EFKMTU	EKMT	EKMTU	CDEFMU	CDEFMU	FKMTU	FMU	EFKM	CDEFU	CDEFU	EFMU	M		CMTU	CMTU	CEMTU	CEMTU	C	EMU	EMU	EU	CEMU	EMU		EM	MTU	MTU	MTU	EMU	EMU	FMU	MU	M	M	CEFMU	CEFMU	FM	EFM	EMU	CDEFMU	CDEFMTU	EFMTU
		13.02 Lakes and ponds	13.02.01 Deep water		EKMT	EKMT	EFKMT	EFKMTU	EKMT	EKMTU	CDEFMTU	CDEFMTU	FKMTU	FMU	EFKM	CDEFU	CDEFU	EFMU	M		CMTU	CMTU	CEMTU	CEMTU	C	EMTU	EMTU	EU	CEMTU	EMTU		EM	MTU	MTU	MTU	EMU	EMU	FMU	MU	M	M	CEFMTU	CEFMTU	FM	EFM	EMTU	CDEFMU	CDEFMTU	EFMTU
			13.02.02 Shallow water		EKMT	EKMT	EFKMT	EFKMTU	EKMT	EKMTU	CDEFMTU	CDEFMTU	FKMTU	FMU	EFKM	CDEFU	CDEFU	EFMU	M		CMTU	CMTU	CEMTU	CEMTU	C	EMTU	EMTU	EU	CEMTU	EMTU		EM	MTU	MTU	MTU	EMU	EMU	FMU	MU	M	M	CEFMTU	CEFMTU	FM	EFM	EMTU	CDEFMU	CDEFMTU	EFMTU
	14. Coastal water bodies and inter-tidal areas	14.01 Coastal water bodies	14.01.01 Pelagic		DEKMT	DEKMT	DEFKMT	DEFKMTU	DEKMT	DEKMTU	EF	EF	EFKT	EFT	EFK	EF	EF	EFT	T		U	U	EU	EU	U	DETU	ETU	E	ETU	ETU			MTU			CE	CE	CFU	U	DEU	U	CEFMTU	CEFMTU	CFM	CFM	CETU	DEFTU	DEFMTU	CFTU
			14.01.02 Benthic		DEKMT	DEKMT	DEFKMT	DEFKMTU	DEKMT	DEKMTU	EF	EF	EFKT	EFT	EFK	EF	EF	EFT	T		U	U	EU	EU	U	DETU	ETU	E	ETU	ETU			MTU			CE	CE	CFU	U	DEU	U	CEFMTU	CEFMTU	CFM	CFM	CETU	DEFTU	DEFMTU	CFTU
		14.02 Inter-tidal areas	14.02.01 Lagoons		EKT	EKT	EFKT	EFKTU	EKT	EKTU	EF	EF	EFKT	EFT	EFK	EF	EF	EFT	T		U	U	EU	EU	U	ETU	ETU	E	ETU	ETU			TU			E	E	FU	U	EU	U	EFTU	EFTU	F	F	ETU	EFTU	EFTU	FTU
			14.02.02 Rocky shores		EKT	EKT	EFKT	EFKTU	EKT	EKTU	EF	EF	EFKT	EFT	EFK	EF	EF	EFT	T		U	U	EU	EU	U	ETU	ETU	E	ETU	ETU			TU			E	E	FU	U	EU	U	EFTU	EFTU	F	F	ETU	EFTU	EFTU	FTU
			14.02.03 Beaches		EKMT	EKMT	EFKMT	EFKMTU	EKMT	EKMTU	EFM	EFM	EFKT	EFT	EFK	EF	EF	EFT	T		MU	MU	EMU	EMU	U	ETU	ETU	E	ETU	ETU			MTU	M	M	EM	EM	FMU	MU	EU	U	EFMTU	EFMTU	FM	FM	EMTU	EFMTU	EFMTU	FMTU
			14.02.04 Coral reefs		CDEKM	CDEKM	CDEFKM	CDEFKMU	CDEKM	CDEKMU	EF	EF	DEFKT	DEFT	DEFK	EF	EF	EFT	T		U	U	EU	EU	CDU	CDETU	CDETU	E	CDETU	CDETU			DMTU			E	E	FU	U	DEU	U	CDEFMU	CDEFMU	FM	FM	EU	CDEFU	CDEFMTU	FTU
			14.02.05 Seagrass beds		DEKMT	DEKMT	DEFKMT	DEFKMTU	DEKMT	DEKMTU	DEF	DEF	DEFKT	DEFT	EFK	DEF	DEF	EFT	T		DU	DU	DEU	DEU	DU	DETU	DETU	E	DETU	DETU			DMTU			CE	CE	CFU	U	EU	U	EFMTU	EFMTU	FM	FM	ETU	DEFTU	DEFMTU	FTU
			14.02.06 Estuaries		CDEKT	CDEKT	CDEFKT	CDEFKTU	CDEKT	CDEKTU	DEF	DEF	DEFKT	DEFT	EFK	DEF	DEF	EFT	T		CDU	CDU	CDEU	CDEU	CDU	CDETU	CDETU	E	CDETU	CDETU			CDTU	C	C	CE	CE	CFU	U	EU	U	CEFTU	CEFTU	F	F	ETU	CDEFTU	CDEFTU	FTU
			14.02.07 Coastal dunes		EKM	EKM	EKM	EKMU	EKM	EKMU	EM	EM	EKT	ET	EK	E	E	ET	T		MU	MU	EMU	EMU	U	ETU	ETU	E	ETU	ETU			MTU			EM	EM	MU	MU	EU	U	EMU	EMU	M	M	EU	EU	EMTU	TU
	15. Open ocean	15.01 Pelagic			KT	KTU	FKT	EFKTU	KTU	KTU	F	F	EFKT	EF	EFK	F	F	E	U				E	E		EU	EU		U	U	U		TU	U	U	C	CE	CF		EU	EU	CEFU	CEFU	CF	CF	CE	DEF	DFTU	CFTU
		15.02 Benthic			KT	KTU	FKT	EFKTU	KTU	KTU	F	F	EFKT	EF	EFK	F	F	E	U				E	E		EU	EU		U	U	U		TU	U	U	C	CE	CF		EU	EU	CEFU	CEFU	CF	CF	CE	DEF	DFTU	CFTU
	16. Atmosphere							F			F	F			F	F	F																					F				F	F	F	F		F	F	F
	17. Groundwater										F	F				F	F																					F				F	F	F	F		F	F	F
	18. Soil
	Note: C= Costanza et al. (1997), D = de Groot et al. (2012), E = Millennium Ecosystem Assessment (2005), F = Landers & Nahlik (2013), K = Kinzig et al. (2007), M = Maynard et al. (2010), P = Peh et al (2013), T = TEEB (2010), U = UK Defra (2011).
	Given the differences of scope and classifications in the assessments, there was a wide range of proportional contributions to the final consensus matrix (with a mathematical maximum of 2,304 linkages). Contributions ranged from 32 cells (Kinzig et al. (2007)) to 619 cells Maynard et al. (2010).
[truncated: 3 more columns]

## Sheet: Annex Table 7 (Consensus 4)
	Annex Table 7 Consensus matrix for Consensus Level 4
	Ecosystem type				Services
					01. Provisioning																02. Regulation & Maintenance																					03. Cultural
					01.01 Nutrition								01.02 Materials					01.03 Energy			02.01 Mediation of waste, toxics and other nuisances					02.02 Mediation of flows						02.03 Maintenance of physical, chemical, biological conditions										03.01 Physical and intellectual interactions with biota, ecosystems, and land-/seascapes [environmental settings]							03.02 Spiritual, symbolic and other interactions with biota, ecosystems, and land-/seascapes [environmental settings]
					01.01.01 Biomass						01.01.02 Water		01.02.01 Biomass			01.02.02 Water		01.03.01 Biomass-based energy sources		01.03.02 Mechanical energy	02.01.01 Mediation by biota		02.01.02 Mediation by ecosystems			02.02.01 Mass flows		02.02.02 Liquid flows		02.02.03 Gaseous / air flows		02.03.01 Lifecycle maintenance, habitat and gene pool protection		02.03.02 Pest and disease control		02.03.03 Soil formation and composition		02.03.04 Water conditions		02.03.05 Atmospheric composition and climate regulation		03.01.01 Physical and experiential interactions		03.01.02 Intellectual and representative interactions					03.02.01 Spiritual and/or emblematic
	Level 1	Level 2	Level 3	Level 4	01.01.01.01 Cultivated crops	01.01.01.02 Reared animals and their outputs	01.01.01.03 Wild plants, algae and their outputs	01.01.01.04 Wild animals and their outputs	01.01.01.05 Plants and algae from in-situ aquaculture	01.01.01.06 Animals from in-situ aquaculture	01.01.02.01 Surface water for drinking	01.01.02.02 Ground water for drinking	01.02.01.01 Fibres and other materials from plants, algae and animals for direct use or processing	01.02.01.02 Materials from plants, algae and animals for agricultural use	01.02.01.03 Genetic materials from all biota	01.02.02.01 Surface water for non-drinking purposes	01.02.02.02 Ground water for non-drinking purposes	01.03.01.01 Plant-based resources	01.03.01.02 Animal-based resources	01.03.02.01 Animal-based energy	02.01.01.01 Bio-remediation by micro-organisms, algae, plants, and animals	02.01.01.02 Filtration / sequestration / storage / accumulation by micro-organisms, algae, plants, and animals	02.01.02.01 Filtration / sequestration / storage / accumulation by ecosystems	02.01.02.02 Dilution by atmosphere, freshwater and marine ecosystems	02.01.02.03 Mediation of smell/noise/visual impacts	02.02.01.01 Mass stabilisation and control of erosion rates	02.02.01.02 Buffering and attenuation of mass flows	02.02.02.01 Hydrological cycle and water flow maintenance	02.02.02.02 Flood protection	02.02.03.01 Storm protection	02.02.03.02 Ventilation and transpiration	02.03.01.01 Pollination and seed dispersal	02.03.01.02 Maintaining nursery populations and habitats	02.03.02.01 Pest control	02.03.02.02 Disease control	02.03.03.01 Weathering processes	02.03.03.02 Decomposition and fixing processes	02.03.04.01 Chemical condition of freshwaters	02.03.04.02 Chemical condition of salt waters	02.03.05.01 Global climate regulation by reduction of greenhouse gas concentrations	02.03.05.02 Micro and regional climate regulation	03.01.01.01 Experiential use of plants, animals and land- / seascapes in different environmental settings	03.01.01.02 Physical use of land- / seascapes in different environmental settings	03.01.02.01 Scientific	03.01.02.02 Educational	03.01.02.03 Heritage, cultural	03.01.02.04 Entertainment	03.01.02.05 Aesthetic	03.02.01.01 Symbolic
	01. Artificial surfaces (including urban and associated areas)	01.01 Dense artificial surfaces			0	0	0	0	0	0	0	0	0	0	0	0	0	0	0	0	0	0	0	0	0	0	0	0	0	0	0	0	0	0	0	0	0	0	0	0	0	0	0	0	0	0	0	0	0
		01.02 Open artificial surfaces			0	0	0	0	0	0	0	0	0	0	0	0	0	0	0	0	0	0	0	0	0	0	0	0	0	0	0	0	0	0	0	0	0	0	0	0	0	0	0	0	0	0	0	0	0
		01.03 Dams			0	0	0	0	0	0	0	0	0	0	0	0	0	0	0	0	0	0	0	0	0	0	0	0	0	0	0	0	0	0	0	0	0	0	0	0	0	0	0	0	0	0	0	0	0
	02. Herbaceous crops	02.01 Annual crops			1	1	1	1	1	1	0	0	1	1	0	0	0	1	1	0	0	0	0	0	0	0	0	0	0	0	0	0	0	0	0	0	0	0	0	0	0	1	1	0	0	0	0	0	1
		02.02 Perennial crops and pasture			1	1	1	1	1	1	0	0	1	1	0	0	0	1	1	0	0	0	0	0	0	0	0	0	0	0	0	0	0	0	0	0	0	0	0	0	0	1	1	0	0	0	0	1	1
	03. Woody crops				1	1	1	1	1	1	0	0	1	1	0	0	0	1	1	0	0	0	0	0	0	0	0	0	0	0	0	0	0	0	0	0	0	0	0	0	0	1	1	0	0	0	1	1	1
	04. Multiple or layered crops				1	1	1	1	1	1	0	0	1	1	0	0	0	1	1	0	0	0	0	0	0	0	0	0	0	0	0	0	0	0	0	0	0	0	0	0	0	1	1	0	0	0	1	1	1
	05. Grassland				1	1	1	1	1	1	0	0	1	0	1	0	0	0	0	0	1	1	1	1	0	1	0	0	0	0	0	1	1	0	0	1	1	0	0	0	0	1	1	0	0	1	1	1	1
	06. Tree covered areas	06.01 Treed wetlands	06.01.01 Treed swamps		1	1	1	1	1	1	1	1	1	1	1	1	1	1	0	0	1	1	1	1	0	1	1	1	1	1	0	0	1	1	1	1	1	1	0	0	0	1	1	0	1	1	1	1	1
			06.01.02 Treed peatlands		1	1	1	1	1	1	1	1	1	1	1	1	1	1	0	0	1	1	1	1	0	1	1	1	1	1	0	0	1	1	1	1	1	1	0	0	0	1	1	0	1	1	1	1	1
		06.02 Forest	06.02.01 Coniferous forest	06.02.01.01 Very dense coniferous forest	1	1	1	1	0	0	1	1	1	1	1	0	0	1	0	0	1	1	1	1	0	1	0	0	1	0	0	0	1	0	0	1	1	1	0	1	1	1	1	0	0	1	1	1	1
				06.02.01.02 Dense coniferous forest	1	1	1	1	0	0	1	1	1	1	1	0	0	1	0	0	1	1	1	1	0	1	0	0	1	0	0	0	1	0	0	1	1	1	0	1	1	1	1	0	0	1	1	1	1
				06.02.01.03 Open coniferous forest	0	0	1	1	0	0	0	0	1	1	0	0	0	1	0	0	1	1	1	1	0	1	0	0	1	0	0	0	1	0	0	1	1	1	0	1	0	1	1	0	0	0	1	1	1
			06.02.02 Deciduous forest	06.02.02.01 Very dense deciduous forest	1	1	1	1	0	0	1	1	1	1	1	0	0	1	0	0	1	1	1	1	0	1	0	0	1	0	0	0	1	0	0	1	1	1	0	1	1	1	1	0	0	1	1	1	1
				06.02.02.02 Dense deciduous forest	1	1	1	1	0	0	1	1	1	1	1	0	0	1	0	0	1	1	1	1	0	1	0	0	1	0	0	0	1	0	0	1	1	1	0	1	1	1	1	0	0	1	1	1	1
				06.02.02.03 Open deciduous forest	0	0	1	1	0	0	0	0	1	1	0	0	0	1	0	0	1	1	1	1	0	1	0	0	1	0	0	0	1	0	0	1	1	1	0	1	0	1	1	0	0	0	1	1	1
			06.02.03 Mixed forest	06.02.03.01 Very dense mixed forest	1	1	1	1	0	0	1	1	1	1	1	0	0	1	0	0	1	1	1	1	0	1	0	0	1	0	0	0	1	0	0	1	1	1	0	1	1	1	1	0	0	1	1	1	1
				06.02.03.02 Dense mixed forest	1	1	1	1	0	0	1	1	1	1	1	0	0	1	0	0	1	1	1	1	0	1	0	0	1	0	0	0	1	0	0	1	1	1	0	1	1	1	1	0	0	1	1	1	1
				06.02.03.03 Open mixed forest	0	0	1	1	0	0	0	0	1	1	0	0	0	1	0	0	1	1	1	1	0	1	0	0	1	0	0	0	1	0	0	1	1	1	0	1	0	1	1	0	0	0	1	1	1
	07. Mangroves				1	1	1	1	1	1	1	1	1	1	1	0	0	1	0	0	0	0	1	1	0	1	1	0	1	1	0	0	1	0	0	0	0	0	0	0	0	1	1	0	0	0	1	1	0
	08. Shrub covered areas				0	0	0	0	0	0	0	0	1	0	0	0	0	0	0	0	0	0	1	1	0	0	0	0	0	0	0	0	0	0	0	0	0	0	0	0	0	1	1	0	0	1	1	1	1
	09. Shrubs and/or herbaceous vegetation, aquatic or regularly flooded	09.01 Aquatic or emergent marsh			1	1	1	1	1	1	1	1	1	1	1	1	1	1	0	0	1	1	1	1	0	1	1	1	1	1	0	0	1	1	1	1	1	1	0	0	0	1	1	0	1	1	1	1	1
		09.02 Prairie marsh, riverwash			1	1	1	1	1	1	1	1	1	1	1	1	1	1	0	0	1	1	1	1	0	1	1	1	1	1	0	0	1	1	1	1	1	1	0	0	0	1	1	0	1	1	1	1	1
		09.03 Untreed peatland	09.03.01 Fen		1	1	1	1	1	1	1	1	1	1	1	1	1	1	0	0	1	1	1	1	0	1	1	1	1	1	0	0	1	1	1	1	1	1	0	0	0	1	1	0	1	1	1	1	1
			09.03.02 Bog		1	1	1	1	1	1	1	1	1	1	1	1	1	1	0	0	1	1	1	1	0	1	1	1	1	1	0	0	1	1	1	1	1	1	0	0	0	1	1	0	1	1	1	1	1
		09.04 Shrub swamp			1	1	1	1	1	1	1	1	1	1	1	1	1	1	0	0	1	1	1	1	0	1	1	1	1	1	0	0	1	1	1	1	1	1	0	0	0	1	1	0	1	1	1	1	1
	10. Sparsely natural vegetated areas	10.01 Bryoids			0	0	0	0	0	0	1	1	1	1	1	0	0	1	0	0	0	0	0	0	0	1	0	0	0	0	0	0	0	0	0	1	1	0	0	0	0	1	1	0	0	1	1	1	1
		10.02 Sparsely natural vegetated area			0	0	0	0	0	0	1	1	1	1	1	0	0	1	0	0	0	0	0	0	0	1	0	0	0	0	0	0	0	0	0	1	1	0	0	0	0	1	1	0	0	1	1	1	1
	11. Terrestrial barren land				0	0	0	0	0	0	1	1	1	1	1	0	0	0	0	0	0	0	0	0	0	1	0	0	0	0	0	0	0	0	0	1	1	0	0	0	0	1	1	0	0	1	1	1	1
	12. Permanent snow and glaciers				0	0	0	0	0	0	0	0	0	0	0	0	0	0	0	0	0	0	0	0	0	0	0	0	0	0	0	0	0	0	0	0	0	0	0	0	0	0	0	0	0	0	0	0	0
	13. Inland water bodies	13.01 Rivers and streams	13.01.01 Deep water		1	1	1	1	1	1	1	1	1	0	1	1	1	1	0	0	1	1	1	1	0	0	0	0	1	0	0	0	0	0	0	0	0	0	0	0	0	1	1	0	0	0	1	1	1
			13.01.02 Shallow water		1	1	1	1	1	1	1	1	1	0	1	1	1	1	0	0	1	1	1	1	0	0	0	0	1	0	0	0	0	0	0	0	0	0	0	0	0	1	1	0	0	0	1	1	1
		13.02 Lakes and ponds	13.02.01 Deep water		1	1	1	1	1	1	1	1	1	0	1	1	1	1	0	0	1	1	1	1	0	1	1	0	1	1	0	0	0	0	0	0	0	0	0	0	0	1	1	0	0	1	1	1	1
			13.02.02 Shallow water		1	1	1	1	1	1	1	1	1	0	1	1	1	1	0	0	1	1	1	1	0	1	1	0	1	1	0	0	0	0	0	0	0	0	0	0	0	1	1	0	0	1	1	1	1
	14. Coastal water bodies and inter-tidal areas	14.01 Coastal water bodies	14.01.01 Pelagic		1	1	1	1	1	1	0	0	1	0	0	0	0	0	0	0	0	0	0	0	0	1	0	0	0	0	0	0	0	0	0	0	0	0	0	0	0	1	1	0	0	1	1	1	1
			14.01.02 Benthic		1	1	1	1	1	1	0	0	1	0	0	0	0	0	0	0	0	0	0	0	0	1	0	0	0	0	0	0	0	0	0	0	0	0	0	0	0	1	1	0	0	1	1	1	1
		14.02 Inter-tidal areas	14.02.01 Lagoons		0	0	1	1	0	1	0	0	1	0	0	0	0	0	0	0	0	0	0	0	0	0	0	0	0	0	0	0	0	0	0	0	0	0	0	0	0	1	1	0	0	0	1	1	0
			14.02.02 Rocky shores		0	0	1	1	0	1	0	0	1	0	0	0	0	0	0	0	0	0	0	0	0	0	0	0	0	0	0	0	0	0	0	0	0	0	0	0	0	1	1	0	0	0	1	1	0
			14.02.03 Beaches		1	1	1	1	1	1	0	0	1	0	0	0	0	0	0	0	0	0	0	0	0	0	0	0	0	0	0	0	0	0	0	0	0	0	0	0	0	1	1	0	0	1	1	1	1
			14.02.04 Coral reefs		1	1	1	1	1	1	0	0	1	1	1	0	0	0	0	0	0	0	0	0	0	1	1	0	1	1	0	0	1	0	0	0	0	0	0	0	0	1	1	0	0	0	1	1	0
			14.02.05 Seagrass beds		1	1	1	1	1	1	0	0	1	1	0	0	0	0	0	0	0	0	0	0	0	1	1	0	1	1	0	0	1	0	0	0	0	0	0	0	0	1	1	0	0	0	1	1	0
			14.02.06 Estuaries		1	1	1	1	1	1	0	0	1	1	0	0	0	0	0	0	0	0	1	1	0	1	1	0	1	1	0	0	1	0	0	0	0	0	0	0	0	1	1	0	0	0	1	1	0
			14.02.07 Coastal dunes		0	0	0	1	0	1	0	0	0	0	0	0	0	0	0	0	0	0	0	0	0	0	0	0	0	0	0	0	0	0	0	0	0	0	0	0	0	0	0	0	0	0	0	1	0
	15. Open ocean	15.01 Pelagic			0	0	0	1	0	0	0	0	1	0	0	0	0	0	0	0	0	0	0	0	0	0	0	0	0	0	0	0	0	0	0	0	0	0	0	0	0	1	1	0	0	0	0	1	1
		15.02 Benthic			0	0	0	1	0	0	0	0	1	0	0	0	0	0	0	0	0	0	0	0	0	0	0	0	0	0	0	0	0	0	0	0	0	0	0	0	0	1	1	0	0	0	0	1	1
	16. Atmosphere				0	0	0	0	0	0	0	0	0	0	0	0	0	0	0	0	0	0	0	0	0	0	0	0	0	0	0	0	0	0	0	0	0	0	0	0	0	0	0	0	0	0	0	0	0
	17. Groundwater				0	0	0	0	0	0	0	0	0	0	0	0	0	0	0	0	0	0	0	0	0	0	0	0	0	0	0	0	0	0	0	0	0	0	0	0	0	0	0	0	0	0	0	0	0
	18. Soil				0	0	0	0	0	0	0	0	0	0	0	0	0	0	0	0	0	0	0	0	0	0	0	0	0	0	0	0	0	0	0	0	0	0	0	0	0	0	0	0	0	0	0	0	0
	Note: Consensus Level 4 (highlighted cells) denotes ecosystem/ecosystem services linkages where at least four of nine input studies agreed there was an important linkage.
[truncated: 3 more columns]
